# Supplementary material
Source: PubMed Central journal article supplement (PMC4663656)
Supplement: Supp_Fig1.pdf [file Supp_Fig1.pdf]

## Supplementary Data

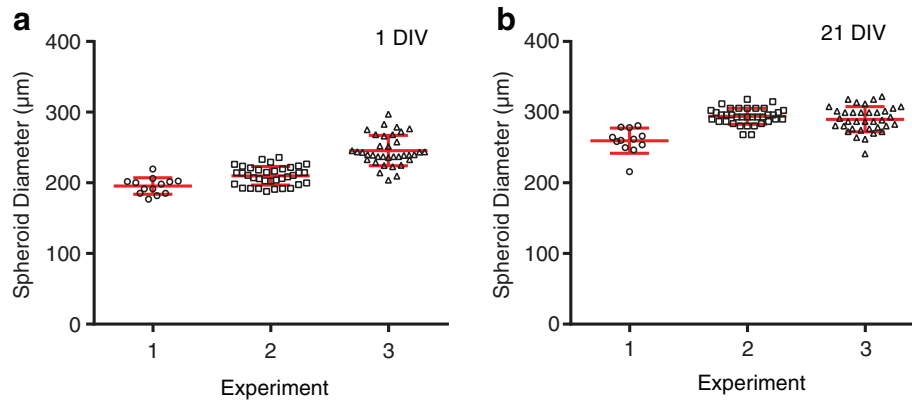

**SUPPLEMENTARY FIG. S1.** Spheroid size within and across experiments. *Dot plots* of spheroid diameters (8k cells spheroid) at (a) 1 DIV and (b) 21 DIV from three independent experiments (12–36 spheroids measured in each experiment). *Red lines* indicate mean  $\pm$  SD. DIV, day *in vitro*.
