# Supplementary material
Source: PubMed Central journal article supplement (PMC4663656)
Supplement: Supp_Fig2.pdf [file Supp_Fig2.pdf]

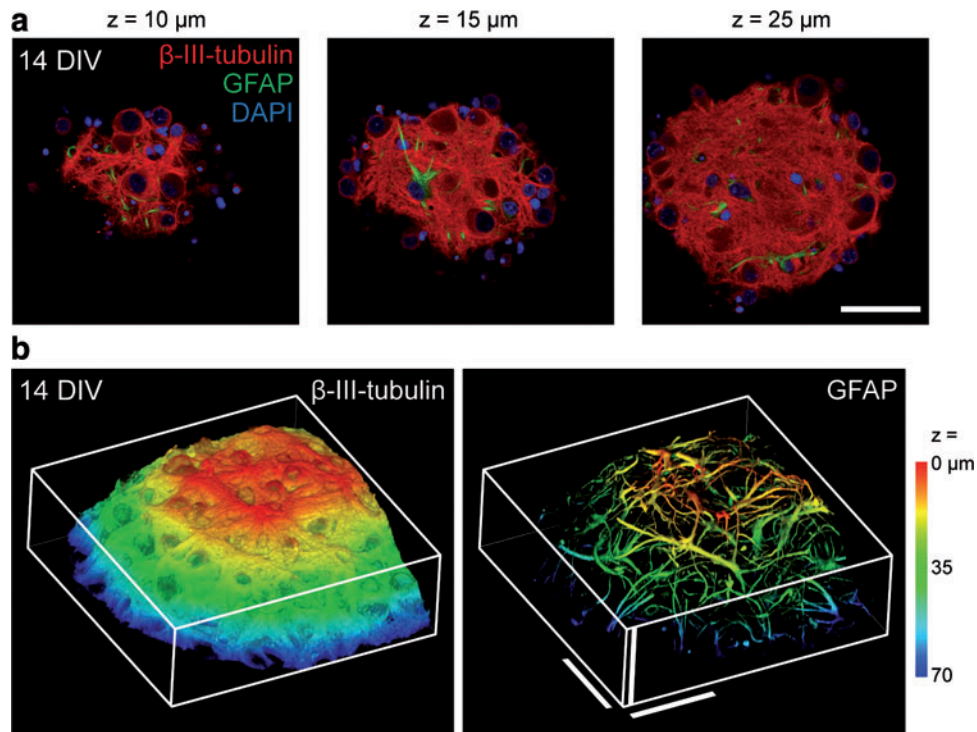

**SUPPLEMENTARY FIG. S2.** Neuron and astrocyte extensions and networks. **(a)** Single Z-slice images taken 10, 15, and 25  $\mu\text{m}$  from the surface of a 14 DIV 8k spheroid show fine  $\beta$ -III-tubulin (*red*) GFAP (*green*)-labeled cell extensions and DAPI-stained nuclei. **(b)** Confocal projections with z-axis depth-code pseudocoloring of a 14 DIV 8k spheroid show  $\beta$ -III-tubulin (*left*) and GFAP (*right*) structures in 3D. Color represents the z-depth from top surface. Scale bars: **(a)** 50  $\mu\text{m}$  and **(b)** 70  $\mu\text{m}$ . 3D, three-dimensional; GFAP, glial fibrillary acidic protein; DAPI, 4',6-diamidino-2-phenylindole.
