# Supplementary material
Source: PubMed Central journal article supplement (PMC4663656)
Supplement: Supp_Fig3.pdf [file Supp_Fig3.pdf]

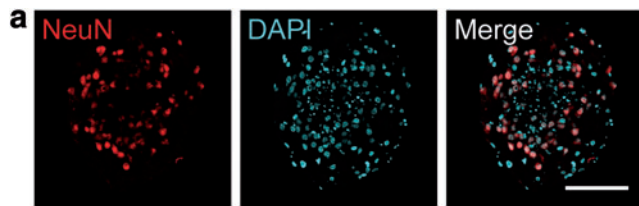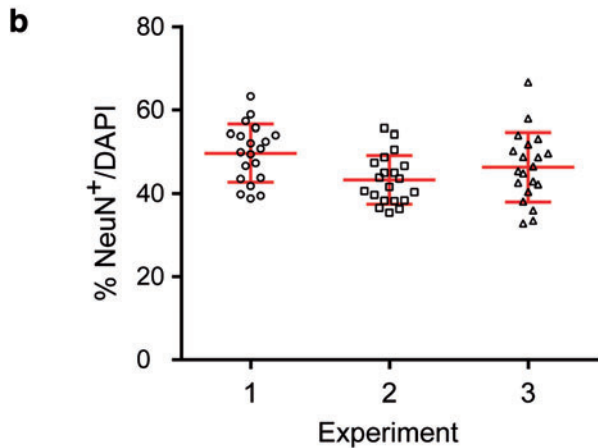

**SUPPLEMENTARY FIG. S3.** Mature neurons in spheroids within and across experiments. **(a)** Confocal images of cryosections through the center of an 8k spheroid at 21 DIV. Mature neurons were immunostained with NeuN (*red*), and nuclei were counterstained with DAPI (*cyan*). **(b)** *Dot plots* of percentages of cells (DAPI) that expressed NeuN. *Red lines* represent mean  $\pm$  SD. Three independent experiments, 20 sections per experiment.
