# Supplementary material
Source: PubMed Central journal article supplement (PMC4663656)
Supplement: Supp_Fig5.pdf [file Supp_Fig5.pdf]

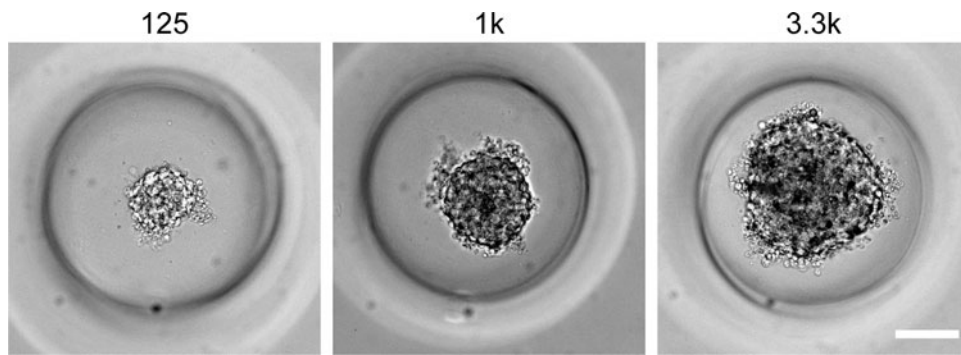

**SUPPLEMENTARY FIG. S5.** Three-dimensional hippocampal spheroids. Monodispersed rat hippocampal cells self-assembled into spheroids in the micromolded hydrogels. Phase contrast images of hippocampal spheroids at 1 DIV with initial seeding densities of 125, 1k, and 3k cells/spheroid. Scale bar: 100  $\mu\text{m}$ .
